# Supplementary material for: Genetically-Determined Hyperfunction of the S100B/RAGE Axis Is a Risk Factor for Aspergillosis in Stem Cell Transplant Recipients
Source: PLoS One. 2011 Nov 17;6(11):e27962. doi: 10.1371/journal.pone.0027962 (PMC3219695; doi:10.1371/journal.pone.0027962)
Supplement: Table S3 — Genotype distribution of RAGE and S100B polymorphisms according to antifungal prophylaxis. (DOC) [file pone.0027962.s007.doc]

**Table S3.** Genotype distribution of *RAGE* and *S100B* polymorphisms according to antifungal prophylaxis.

| **Genotype** | **Fluconazole (n=28)** | **LAmB**  **(n=195)** | ***P* *** |
| --- | --- | --- | --- |
| **D WT*RAGE*** | 17 (60.7%) | 91 (46.7%) |  |
| **D SNP*RAGE*** | 11 (39.3%) | 104 (53.3%) | 0.22 |
| **R WT*RAGE*** | 16 (57.1%) | 81 (41.5%) |  |
| **R SNP*RAGE*** | 12 (42.9%) | 114 (58.5%) | 0.15 |
| **D WT*S100B*** | 22 (78.6%) | 166 (85.1%) |  |
| **D SNP*S100B*** | 6 (21.4%) | 29 (14.9%) | 0.40 |
| **R WT*S100B*** | 20 (71.4%) | 164 (84.1%) |  |
| **R SNP*S100B*** | 8 (28.6%) | 31 (15.9%) | 0.11 |

LAmB – liposomal amphotericin-B; D – donor; R – recipient; WT – wild-type; SNP – single nucleotide polymorphism; WT*RAGE* – TT genotype; SNP*RAGE* – TA + AA genotypes; WT*S100B* – CC genotype; SNP*S100B* – CT + TT genotypes.

**P* values are from Fisher’s exact test.
